# Supplementary material for: Long-chain n-alkane biodegradation coupling to methane production in an enriched culture from production water of a high-temperature oil reservoir
Source: PubMed Central journal article supplement (PMC7138878; doi:10.1186/s13568-020-00998-5), 2020-04-07
Supplement: 13568_2020_998_MOESM1_ESM.pdf [file 13568_2020_998_MOESM1_ESM.pdf]

## Supplementary Materials

*AMB express*

### **Long-chain *n*-alkane biodegradation coupling to methane production in an enriched culture from production water of a high-temperature oil reservoir**

Jing Chen<sup>1,5</sup>, Yi-Fan Liu<sup>1,5</sup>, Lei Zhou<sup>1,5</sup>, Muhammad Irfan<sup>1,4</sup>, Zhao-Wei Hou<sup>2</sup>, Wei Li<sup>2</sup>, Serge Maurice Mbadinga<sup>1,5</sup>, Jin-Feng Liu<sup>1,5</sup>, Shi-Zhong Yang<sup>1,5</sup>, Xiao-Lin Wu<sup>2\*</sup>, Ji-Dong Gu<sup>3</sup>, Bo-Zhong Mu<sup>1,5\*</sup>

<sup>1</sup> *State Key Laboratory of Bioreactor Engineering and School of Chemistry and Molecular Engineering, East China University of Science and Technology, 130 Meilong Road, Shanghai 200237, P.R. China*

<sup>2</sup> *Research Institute of Daqing Oilfield Company Limited, PetroChina, Daqing, Heilongjiang 163712, P. R. China*

<sup>3</sup> *School of Biological Sciences, The University of Hong Kong, Pokfulam Road, Hong Kong Special Administrative Region, P.R. China*

<sup>4</sup> *Department of Chemical, Polymer and Composite Materials Engineering, University of Engineering and Technology, KSK Campus, Lahore 54890, Pakistan*

<sup>5</sup> *Engineering Research Center of Microbial Enhanced Oil Recovery, East China University of Science and Technology, 130 Meilong Road, Shanghai 200237, P.R. China*

\*Corresponding Author:

Bo-Zhong Mu, E-mail: [bzmu@ecust.edu.cn](mailto:bzmu@ecust.edu.cn)

Xiao-Lin Wu, E-mail: [wuxldq@petrochina.com.cn](mailto:wuxldq@petrochina.com.cn)

**Table S1** Predicted and measured methane (CH<sub>4</sub>) yield from enrichment cultures amended with *n*-alkane mixtures incubated after 322 and 736 days

| <b>Alkanes</b>         | <b>Time (days)</b> | <b>Substrate Consumed (mg)</b> | <b>Substrate Consumed (μmol)</b> | <b>Percent of substrate depletion</b> | <b>Predicted CH<sub>4</sub> Yield (μmol) §</b> | <b>Measured CH<sub>4</sub> Yield (μmol) *</b> | <b>Theoretical production CH<sub>4</sub> (%)</b> |
|------------------------|--------------------|--------------------------------|----------------------------------|---------------------------------------|------------------------------------------------|-----------------------------------------------|--------------------------------------------------|
|                        |                    | C <sub>22</sub>                | 21.68                            | 68.49                                 | 54.2%                                          |                                               |                                                  |
|                        |                    | C <sub>24</sub>                | 18.70                            | 55.22                                 | 46.8%                                          |                                               |                                                  |
|                        | 322                | C <sub>26</sub>                | 12.46                            | 33.99                                 | 31.3%                                          | CH <sub>4</sub><br>4924.755                   | CH <sub>4</sub><br>39.45                         |
|                        |                    | C <sub>28</sub>                | 16.28                            | 41.24                                 | 40.7%                                          |                                               | CH <sub>4</sub><br>0.80%                         |
| <b><i>n</i>-alkane</b> |                    | C <sub>30</sub>                | 22.72                            | 53.72                                 | 56.8%                                          |                                               |                                                  |
| <b>mixtures</b>        |                    | C <sub>22</sub>                | 38.91                            | 122.89                                | 97.3%                                          |                                               |                                                  |
|                        |                    | C <sub>24</sub>                | 39.22                            | 115.82                                | 98.0%                                          |                                               |                                                  |
|                        | 736                | C <sub>26</sub>                | 39.58                            | 107.94                                | 99.0%                                          | CH <sub>4</sub><br>10089.245                  | CH <sub>4</sub><br>1680.03                       |
|                        |                    | C <sub>28</sub>                | 39.80                            | 100.82                                | 99.5%                                          |                                               | CH <sub>4</sub><br>16.7%                         |
|                        |                    | C <sub>30</sub>                | 39.87                            | 94.29                                 | 99.7%                                          |                                               |                                                  |

\* Calculated from the difference of measured initial methane production, taking into account the methane production in control group (day 322: 32.98 μmol; day 736: 43.17 μmol).

§ Calculated using Equations 1-5 (main text) and the calculated mass of substrate consumed.

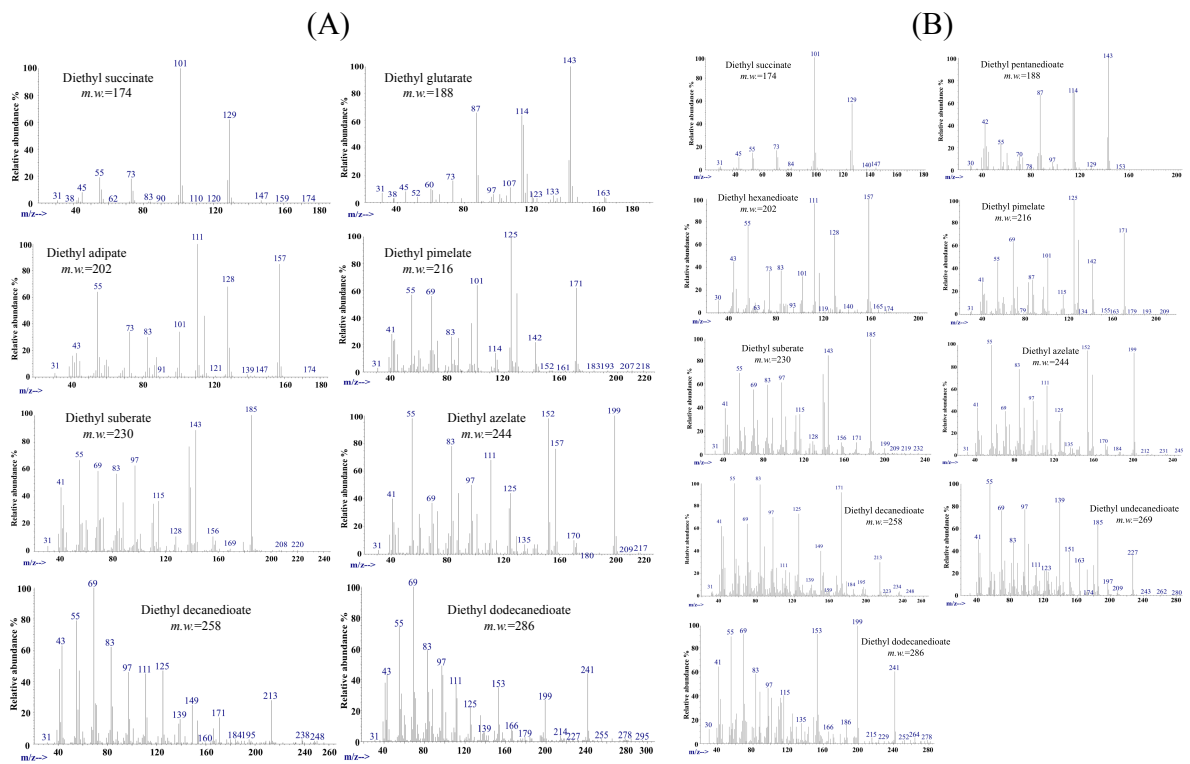

**Fig. S1** Mass spectral profiles of dicarboxylic acids identified in (A) E1 and (B) E2 cultures (Diethyl esterification derivatives).

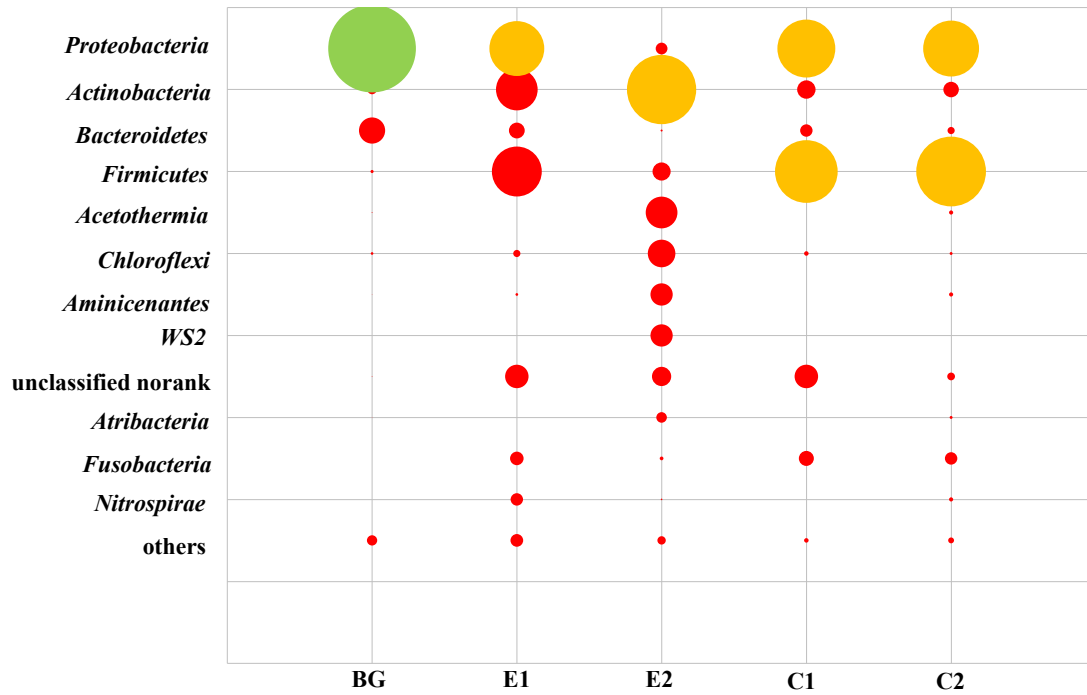

**Fig. S2** Bubble plot of bacteria at the phylum level showing the relative abundance in enrichment cultures after incubations (BG: inoculum; E1 and E2: *n*-alkanes-amended cultures at day 322 and 736; C1 and C2: un-amended samples at day 322 and 736; Red: < 30%; Yellow: 30-80%; Green: >= 80%)

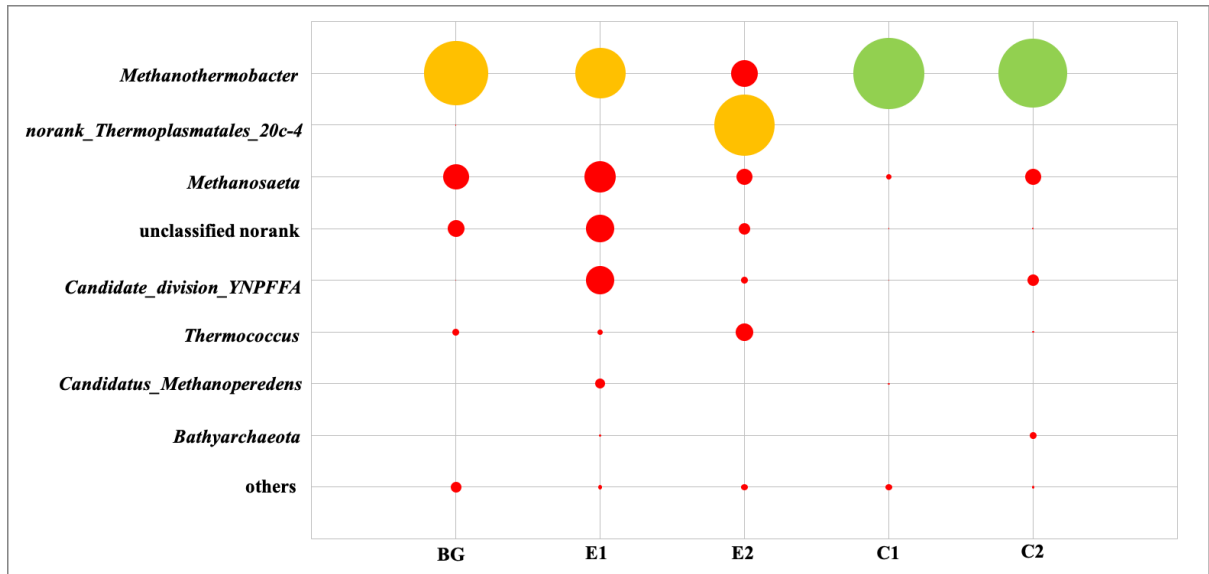

**Fig. S3** Bubble plot of archaea at the genus level showing the relative abundance in enrichment cultures after incubations (BG: inoculum; E1 and E2: *n*-alkanes-amended cultures at day 322 and 736; C1 and C2: un-amended samples at day 322 and 736; Red: < 30%; Yellow: 30-80%; Green: >= 80%)
